# Supplementary material
Source: PubMed Central journal article supplement (PMC4150748)
Supplement: NIHMS604247-supplement-01.pdf [file NIHMS604247-supplement-01.pdf]

## Supplemental Figures.

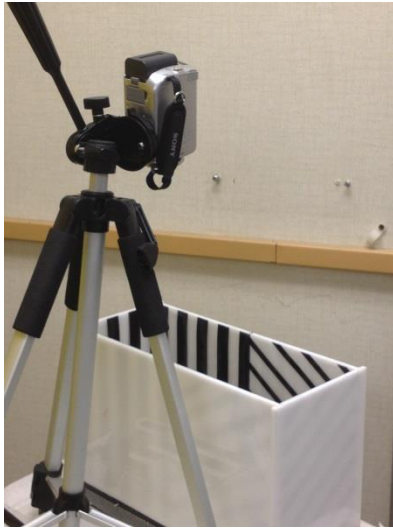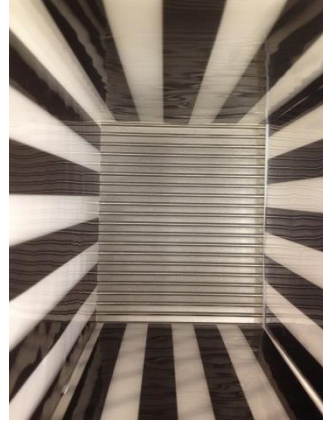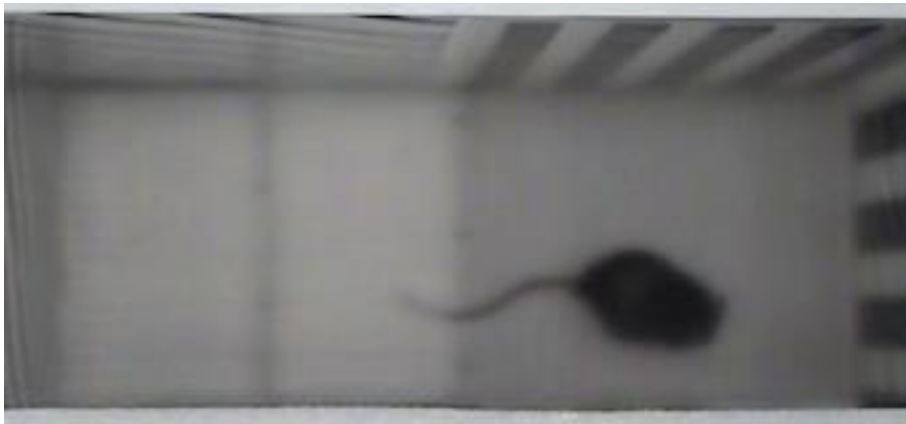

The CPP apparatus as used in the laboratory (Left). One chamber with isolation divider in place for conditioning (Right). A mouse in the apparatus, open to both sides for the testing paradigm (Below). The box is made of white acrylic walls set over a removable floor that has equal sides of wire mesh and metal rods (Med Associates Inc.). Videos are taken with a Sony Handycam positioned on above the apparatus as seen through antireflective glass. The video is analyzed by custom software that tracks the mouse and calculates the time spent on either side of the apparatus.
